# Supplementary material
Source: PubMed Central journal article supplement (PMC3040651)
Supplement: pgen.1001301.s006.pdf [file pgen.1001301.s006.pdf]

Table S4

| tree  | $\tau$ | sites | pairs | pairs significant at 0.01 |        |           |
|-------|--------|-------|-------|---------------------------|--------|-----------|
|       |        |       |       | obs                       | FDR, % | overlap   |
| ha.00 | 66     | 142   | 20022 | 298**                     | 66.7   | 183 (55%) |
| ha.01 | 70     | 144   | 20592 | 305**                     | 65.5   | 202 (60%) |
| ha.02 | 68     | 140   | 19460 | 261*                      | 73.8   | 158 (47%) |
| ha.03 | 75     | 140   | 19460 | 253                       | 78.1   | 156 (47%) |
| ha.04 | 66     | 143   | 20306 | 292*                      | 69.5   | 190 (57%) |
| ha.05 | 74     | 144   | 20592 | 299**                     | 67.1   | 189 (57%) |
| ha.06 | 69     | 141   | 19740 | 277                       | 72.3   | 186 (56%) |
| ha.07 | 65     | 139   | 19182 | 267*                      | 71.5   | 184 (55%) |
| ha.08 | 70     | 141   | 19740 | 292*                      | 66.1   | 178 (53%) |
| ha.09 | 70     | 141   | 19740 | 262                       | 76.5   | 175 (53%) |
